# Supplementary material
Source: PubMed Central journal article supplement (PMC3220737)
Supplement: NIHMS332719-supplement-1.pdf [file NIHMS332719-supplement-1.pdf]

## Supplemental Methods and Data

### MyD88 Deficiency Attenuates Angiotensin II-induced Abdominal Aortic Aneurysm

#### Formation Independent of Signaling Through Toll-like Receptors 2 and 4

A. Phillip Owens III,<sup>1,2</sup> Debra L. Rateri,<sup>1</sup> Deborah A. Howatt,<sup>1</sup> Kathryn J. Moore,<sup>3</sup>

Peter S. Tobias,<sup>4</sup> Linda A. Curtiss,<sup>4</sup> Hong Lu,<sup>1</sup> Lisa A. Cassis,<sup>5</sup> Alan Daugherty<sup>1,2,5</sup>

Saha Cardiovascular Research Center <sup>1</sup>  
Graduate Center for Toxicology <sup>2</sup>  
Graduate Center for Nutritional Sciences <sup>5</sup>  
University of Kentucky  
Lexington, KY 40536

Leon H. Charney Division of Cardiology <sup>3</sup>  
New York University School of Medicine  
New York, NY 10016

Department of Immunology and Microbial Sciences <sup>4</sup>  
Scripps Research Institute  
La Jolla, CA 92037

## MATERIALS AND METHODS

### Experimental Animals and Diet

MyD88<sup>-/-</sup> x apoE<sup>-/-</sup> mice were obtained from Drs. Freeman and Moore.<sup>1</sup> MyD88<sup>-/-</sup> mice were also bred into LDLR<sup>-/-</sup> background (N10 to C57BL/6 background) using mice from The Jackson Laboratory. LDLR<sup>-/-</sup> mice that were either TLR2<sup>+/+</sup> or <sup>-/-</sup>, or TLR4<sup>+/+</sup> or <sup>-/-</sup> were obtained from Drs. Curtiss and Tobias (Scripps Institute)<sup>2</sup> and Dr. Akira (Osaka University).<sup>3</sup>

All mice were bred as littermate controls, and housed in a pathogen-free barrier facility. All MyD88<sup>+/+</sup> and <sup>-/-</sup> mice were given autoclaved sterile water ad libitum containing sulfatrim (0.2%). ApoE<sup>-/-</sup> mice were fed a normal laboratory diet throughout experimentation. LDLR<sup>-/-</sup> mice were fed a diet enriched with saturated fat (milk fat 21% wt/wt) and cholesterol (0.2% wt/wt; Diet number TD.88137, Harlan Teklad) for 1 week prior to AngII infusion and throughout the duration of this infusion. All studies were performed with the approval of the University of Kentucky Institutional Animal Care and Use Committee.

### Genotyping by Polymerase Chain Reaction

The primers used to genotype mice for apoE, LDLR, MyD88, TLR2, and TLR4 are listed in online Table I. Genotypes were verified by two independent investigators.

### Osmotic Minipump Implantation

At 8 to 12 weeks of age, male mice were implanted with Alzet osmotic minipumps (Model 2004, Durect Corporation) subcutaneously into the right flank. Infusion of AngII (1,000 ng/kg/min; Catalog number H-1705, Bachem) continued for 28 days, as described previously.<sup>4</sup>

### Irradiation and Bone Marrow-derived Cell Repopulation

This procedure was performed as described previously.<sup>5</sup> Male LDLR<sup>-/-</sup> mice (6 to 8 weeks old) were lethally irradiated with a total of 900 rads divided into two doses (450 rads/dose, 3 hours apart) from a cesium  $\gamma$  source. Bone marrow-derived cells were harvested from MyD88<sup>+/+</sup> or <sup>-/-</sup> and TLR4<sup>+/+</sup> or <sup>-/-</sup> male mice (6-8 weeks old) and injected into irradiated, recipient LDLR<sup>-/-</sup> mice ( $1 \times 10^7$  donor cells per animal).

Four weeks after irradiation, recipient mice were fed the saturated fat-enriched diet. AngII infusion was started 1 week later, while mice were maintained on this special diet. At termination, DNA was isolated from bone marrows of the recipient mice and PCR was performed to verify the successful repopulation of donor cells.

### Blood Pressure Measurements

Systolic blood pressure (SBP) was measured on conscious mice using either BP-2000 (Visitech Systems) or Coda 8 (Kent Scientific Corp) tail-cuff system as described previously.<sup>6</sup> SBP was measured for 5 consecutive days prior to pump implantation, and during the last week of AngII administration.

### **Aortic Tissue and Plasma Collection**

Twenty-eight days after pump implantation, mice were terminated, and blood was drawn from right ventricles for plasma collection. Aortas were perfused with saline, extracted, and placed into 10% (wt/vol) formalin. These aortas were then carefully cleaned free of adventitia for abdominal aortic aneurysm (AAA) and atherosclerosis analyses.

### **White Blood Cell Analysis**

White blood cells and the subtypes in whole blood were immediately counted at the time of termination on a Hemavet 950 LV veterinary multi-species hematology system (Drew Scientific).

### **Measurement of Plasma Lipids**

Plasma cholesterol concentrations and lipoprotein cholesterol distribution were analyzed as described previously.<sup>7</sup>

### **Measurements of Abdominal Aortic Aneurysms**

Maximal external diameters of suprarenal aortas were measured to define AAAs as described previously.<sup>8</sup>

### **Quantification of Atherosclerosis**

Atherosclerotic lesions were measured on the intimal surface of aortic arches and thoracic aortas using an en face technique, as described previously.<sup>9,10</sup>

### **Histology and Immunostaining**

Abdominal aortas or spleens were embedded in OCT and sectioned in a cryostat. Staining of hematoxylin and eosin was performed in aortic sections. Immunostaining of CD68 was determined in sections of spleens using a rat anti-CD68 antibody (FA-11; Catalog number MCA1957, AbD Serotec), as described previously.<sup>11</sup>

### **Blood Monocyte and Gr-1/Ly-6C Determination with Flow Cytometry**

MyD88<sup>-/-</sup> x LDLR<sup>-/-</sup>, TLR4<sup>-/-</sup> x LDLR<sup>-/-</sup>, and LDLR<sup>-/-</sup> mice (n=8/genotype) were fed the saturated fat-enriched diet for 3 weeks (started 1 week prior to AngII infusion) and infused with AngII for 2 weeks. Peripheral blood was collected into 0.2% EDTA at the termination and mononuclear cells were isolated via lysis of red blood cells with an ammonium chloride solution. In a separate experiment, spleens from MyD88<sup>+/+</sup> x LDLR<sup>-/-</sup> and MyD88<sup>-/-</sup> x LDLR<sup>-/-</sup> male mice were harvested (n=4/genotype) and split into 4 equal sections. All sections were incubated in RPMI 1640 with fetal bovine serum (10% vol/vol), glucose (1% wt/vol), penicillin/streptomycin (1% vol/vol of each), 4-(2-hydroxyethyl)-1-piperazineethanesulfonic acid (HEPES; 1mM), and sodium pyruvate (1 mM) with either saline or AngII (1  $\mu$ M) for 24 hours. Subsequently, splenocytes were isolated by crushing the spleen sections into 100  $\mu$ M cell strainer and all red blood cells were lysed using the ammonium chloride solution. Peripheral blood and splenic monocyte populations were determined via fluorescence-activated-cell sorting (FACS™)

on a Becton Dickson LSRII using antibodies against CD115 (phycoerythrin labeled; Catalog number 12-1162-83, eBioscience), F4/80 (biotinylated; Catalog number MCA497B, AbD Serotec), and Gr-1 (PerCp-Cy5.5 labeled; Catalog number 552093, BD Pharmingen). The biotinylated antibody was detected using streptavidin-APC (eBioscience). Monocyte populations were determined as being CD115 and F4/80 double positive. These double positive monocytes were then classified as Ly-6C low (Ly-6C<sup>low</sup>), intermediate (Ly-6C<sup>int</sup>), and high (Ly-6C<sup>hi</sup>), as described previously.<sup>12</sup>

### **Thioglycollate Elicitation of Peritoneal Macrophages**

MyD88<sup>-/-</sup> x LDLR<sup>-/-</sup> (n=10), TLR4<sup>-/-</sup> x LDLR<sup>-/-</sup> (n=5), and LDLR<sup>-/-</sup> (n=10) mice were fed the saturated fat-enriched diet for 1 week and subsequently injected intra-peritoneally with thioglycollate broth medium (1 ml; 4% wt/vol). Four days after injection, mice were killed, and peritoneal macrophages were extracted, as described previously.<sup>13</sup> Red blood cells were lysed using the ammonium chloride solution. Cell numbers were calculated using a hemacytometer and normalized to CD68 positive cell population, as stained with a fluorescein isothiocyanate-labeled CD68 antibody (Catalog number MCA1957F, AbD Serotec) 1:10 and analyzed via flow cytometric analysis.

### **Real-time Polymerase Chain Reaction**

Vascular smooth muscle cells (VSMCs) were harvested from aortas of C57BL/6 mice as described previously.<sup>14,15</sup> These cells were incubated with saline (24 hours), AngII (1  $\mu$ M for 24 hours), or lipopolysaccharide (1  $\mu$ g/ml for 6 hours; Invitrogen). Cells were washed and RNA was harvested using the Qiagen All Prep RNA/protein kit. All samples were incubated with Turbo DNA-free (Ambion) to remove DNA contamination. Real-time PCR was performed as described previously.<sup>16</sup> Taqman probes were utilized for detection of TLR4 (AB catalog Mm00445273\_m1) and MyD88 (AB catalog Mm00440339\_g1). Real-time PCR of 18S rRNA was used as the endogenous control (Catalog number 4352930E, Applied Biosystems). Negative controls were performed as described previously.<sup>16</sup>

### **Statistics**

All statistical analyses were performed using either version 3.5 of SigmaStat (SPSS Inc.) or version 8.2 of SAS (SAS Institute). All measurements are represented as the mean $\pm$ SEM. Two-group comparisons on quantitative variables were performed parametrically (Student's t test) or nonparametrically (Mann-Whitney Rank Sum test) according to the results of preliminary tests for within-group normality and equality of variances. SBP data were analyzed by fitting a linear mixed model with explanatory variables of genotypes and time (prior to and during AngII infusion) along with random effects for individual mice. One Way ANOVA was performed, where indicated, with an appropriate post hoc test. Values with P<0.05 were considered statistically significant.

**Table I. Primers Used for Genotyping Mice**

| <b>Gene</b> | <b>Primers</b>                                                                                     |
|-------------|----------------------------------------------------------------------------------------------------|
| ApoE        | 5'-GCCGCCCCGACTGCATCT<br>5'-TGTGACTTGGGAGCTCTGCAGC<br>5'-GCCTAGCCGAGGGAGAGCCG                      |
| LDLR        | 5'-AGGTGAGATGACAGGAGATC<br>5'-AGGATGACTTCCGATGCCAG<br>5'-GCAGTGCTCCTCATCTGACTTG                    |
| MyD88       | 5'-TGGCATGCCTCCATCATAGTTAACC<br>5'-GTCAGAAACAACCACCACCATGC<br>5'-ATCGCCTTCTATCGCCTTCTTGACG         |
| TLR2        | 5'-TTGGATAAGTCTGATAGCCTTGCCTCC<br>5'-ATCGCCTTCTATCGCCTTCTTGACGAG<br>5'-GTTTAGTGCCTGTATCCAGTCAGTGCG |
| TLR4        | 5'-TGTTGCCCTTCAGTCACAGAGACTCTG<br>5'-CGTGTAACCAGCCAGGTTTTGAAGGC<br>5'-ATCGCCTTCTATCGCCTTCTTGACGAG  |

**Table II. Incidence and Rupture Rate of AngII-induced AAAs in Whole Body Deficient Mice and their Relative Wild Type Controls**

| Mouse Genotype      |                      | Number of Mice | AAA incidence | Death due to Aortic Rupture |
|---------------------|----------------------|----------------|---------------|-----------------------------|
| ApoE <sup>-/-</sup> | MyD88 <sup>+/+</sup> | 42             | 33/42 (79%)   | 14/42 (33%)                 |
|                     | MyD88 <sup>-/-</sup> | 27             | 2/27 (7%) *   | 1/27 (4%)*                  |
| LDLR <sup>-/-</sup> | MyD88 <sup>+/+</sup> | 22             | 19/22 (86%)   | 8/22 (36%)                  |
|                     | MyD88 <sup>-/-</sup> | 23             | 2/23 (9%)*    | 1/23 (4%)*                  |
|                     | TLR2 <sup>+/+</sup>  | 9              | 8/9 (89%)     | 2/9 (22%)                   |
|                     | TLR2 <sup>-/-</sup>  | 11             | 9/11 (82%)    | 4/11 (36%)                  |
|                     | TLR4 <sup>+/+</sup>  | 10             | 14/14 (100%)  | 4/14 (29%)                  |
|                     | TLR4 <sup>-/-</sup>  | 20             | 5/20 (25%)*   | 4/20 (20%)                  |

\* denotes P<0.01 for comparisons of MyD88<sup>-/-</sup> or TLR4<sup>-/-</sup> versus their relative wild type controls using Fisher Exact Test.

**Table III. Characteristics of Study Mice with Genotypes of MyD88, TLR2, or TLR4**

| Mouse Genotype      |                      | Number of Mice | Plasma Cholesterol Concentrations (mg/dL) | Systolic Blood Pressure (mmHg) |                      | Body Weight (g)         |
|---------------------|----------------------|----------------|-------------------------------------------|--------------------------------|----------------------|-------------------------|
|                     |                      |                |                                           | Baseline                       | AngII Infusion       |                         |
| ApoE <sup>-/-</sup> | MyD88 <sup>+/+</sup> | 42             | 320 ± 32                                  | 112 ± 5                        | 171 ± 4*             | 29.1 ± 0.4              |
|                     | MyD88 <sup>-/-</sup> | 27             | 306 ± 23                                  | 116 ± 3                        | 173 ± 3*             | 29.0 ± 0.3              |
| LDLR <sup>-/-</sup> | MyD88 <sup>+/+</sup> | 19             | 1174 ± 57                                 | 127 ± 2                        | 174 ± 4*             | 27.7 ± 0.9              |
|                     | MyD88 <sup>-/-</sup> | 23             | 1250 ± 72                                 | 135 ± 10                       | 164 ± 5*             | 31.2 ± 0.5 <sup>†</sup> |
|                     | TLR2 <sup>+/+</sup>  | 9              | 1334 ± 57                                 | 115 ± 2                        | 157 ± 4*             | 26.9 ± 1.5              |
|                     | TLR2 <sup>-/-</sup>  | 11             | 1275 ± 62                                 | 118 ± 4                        | 150 ± 9*             | 26.5 ± 3.1              |
|                     | TLR4 <sup>+/+</sup>  | 14             | 1257 ± 62                                 | 142 ± 2 <sup>‡</sup>           | 168 ± 3 <sup>‡</sup> | 26.5 ± 0.6              |
|                     | TLR4 <sup>-/-</sup>  | 19             | 1180 ± 50                                 | 131 ± 2                        | 158 ± 3*             | 27.7 ± 0.5              |

\* denotes P<0.001 for comparisons of AngII infusion versus baseline within genotypes using repeated measures analysis with Bonferroni post hoc test.

<sup>†</sup> denotes P=0.005 for comparisons of MyD88<sup>-/-</sup> versus <sup>+/+</sup> using Mann-Whitney Rank Sum test.

<sup>‡</sup> denotes P=0.03 for comparisons of TLR4<sup>+/+</sup> versus <sup>-/-</sup> at baseline and AngII-infusion, respectively, using two-way ANOVA with repeated measures.

**Table IV. Characteristics of LDLR<sup>-/-</sup> Mice that were Chimeric for either MyD88 or TLR4**

| Mouse Genotype       | Number of Mice | Plasma Cholesterol Concentrations (mg/dL) | Systolic Blood Pressure (mmHg) |                | Body Weight (g) |
|----------------------|----------------|-------------------------------------------|--------------------------------|----------------|-----------------|
|                      |                |                                           | Baseline                       | AngII Infusion |                 |
| MyD88 <sup>+/+</sup> | 22             | 982 ± 63                                  | 122 ± 5                        | 165 ± 15*      | 26.4 ± 0.8      |
| MyD88 <sup>-/-</sup> | 22             | 831 ± 53                                  | 126 ± 3                        | 154 ± 5*       | 28.7 ± 0.8      |
| TLR4 <sup>+/+</sup>  | 22             | 963 ± 65                                  | 123 ± 4                        | 154 ± 6*       | 26.9 ± 0.5      |
| TLR4 <sup>-/-</sup>  | 23             | 977 ± 58                                  | 126 ± 3                        | 152 ± 6*       | 28.0 ± 0.7      |

\* denotes P<0.001 for comparisons of AngII infusion versus baseline within genotypes using repeated measures analysis with Bonferroni post hoc test.



**Table V. Cell Numbers in Peripheral Blood of LDLR<sup>-/-</sup> Mice that were Chimeric for either MyD88 or TLR4**

| Genotype of Donors   | Number of Mice | Cell Number (10 <sup>3</sup> cells/ $\mu$ l) |                |                |                 |               |
|----------------------|----------------|----------------------------------------------|----------------|----------------|-----------------|---------------|
|                      |                | White Blood Cells                            | Neutrophils    | Lymphocytes    | Monocytes       | Platelets     |
| MyD88 <sup>+/+</sup> | 22             | 3.42 $\pm$ 0.3                               | 1.57 $\pm$ 0.3 | 1.54 $\pm$ 0.3 | 0.15 $\pm$ 0.02 | 663 $\pm$ 43  |
| MyD88 <sup>-/-</sup> | 22             | 4.09 $\pm$ 0.5                               | 1.26 $\pm$ 0.2 | 2.48 $\pm$ 0.4 | 0.19 $\pm$ 0.03 | 598 $\pm$ 63  |
| TLR4 <sup>+/+</sup>  | 22             | 4.25 $\pm$ 0.5                               | 1.19 $\pm$ 0.1 | 2.63 $\pm$ 0.3 | 0.26 $\pm$ 0.03 | 661 $\pm$ 48  |
| TLR4 <sup>-/-</sup>  | 23             | 4.12 $\pm$ 0.5                               | 1.25 $\pm$ 0.2 | 2.40 $\pm$ 0.3 | 0.23 $\pm$ 0.03 | 507 $\pm$ 44* |

\* denotes P=0.04 for comparisons of TLR4<sup>-/-</sup> versus <sup>+/+</sup> by Mann-Whitney Rank Sum analysis.

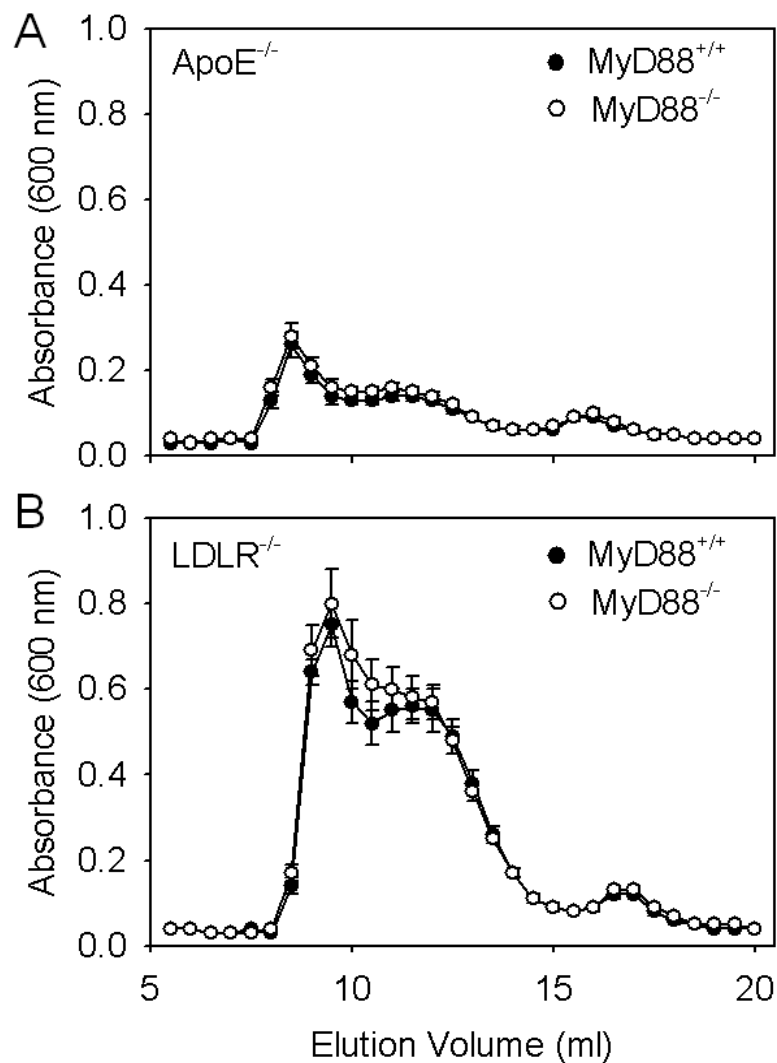

**Figure I. Lipoprotein cholesterol distribution determined by size exclusion chromatography. (A) ApoE<sup>-/-</sup> and (B) LDLR<sup>-/-</sup> mice. Symbols represent means of 5-10 plasma samples from individual mice, and bars are SEMs.**

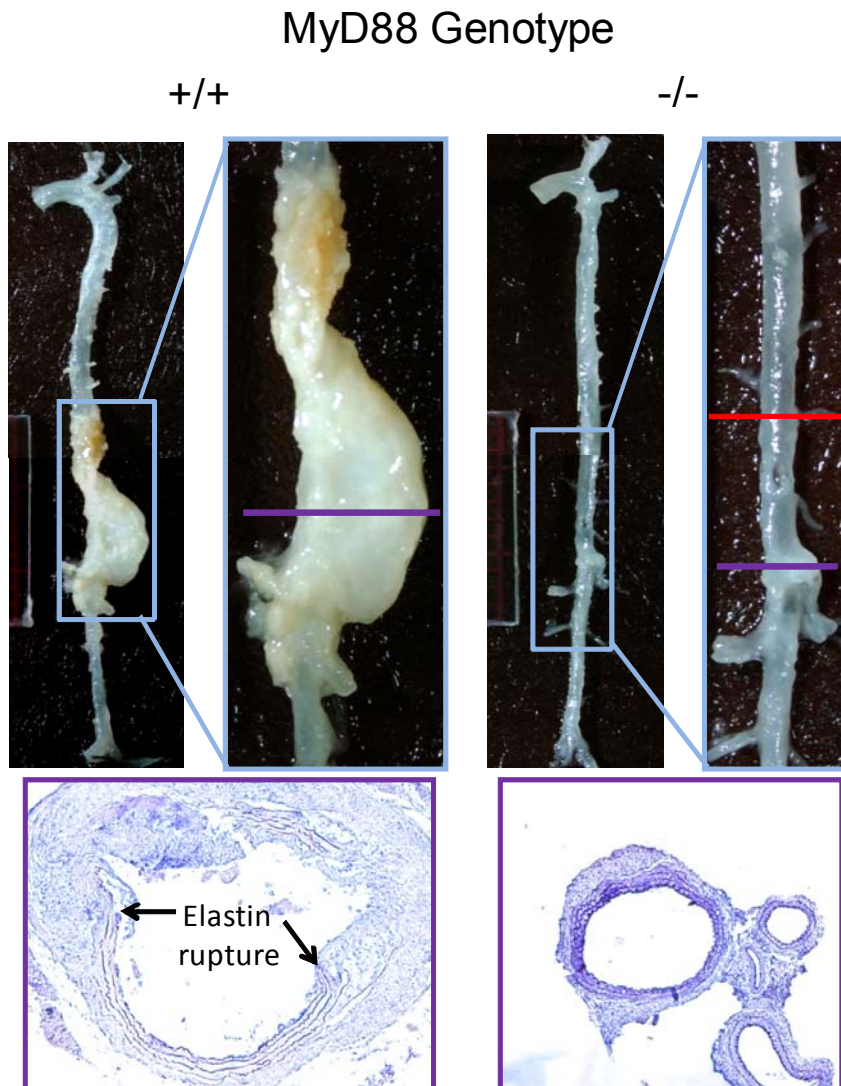

**Figure II.** Examples of aortas from AngII-infused MyD88<sup>+/+</sup> and <sup>-/-</sup> mice in an LDLR<sup>-/-</sup> background. AngII infusion into MyD88<sup>+/+</sup> mice promoted elastin rupture in the suprarenal aortic region and led to profound luminal expansion. In contrast, aortas maintained normal appearance during AngII infusion in MyD88<sup>-/-</sup> mice. The upper panels show entire aortas and magnified images of AAA-prone region. The lower panels show hematoxylin and eosin-stained tissue sections from the suprarenal aortas. Tissue sections were derived approximately from the regions noted with purple lines, respectively. Red line indicates the location of the last intercostal arteries.

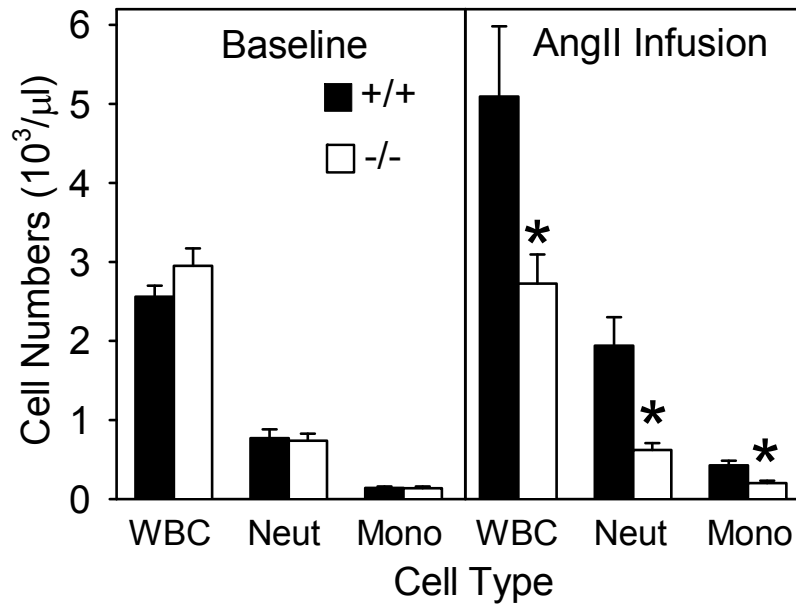

**Figure III. MyD88 deficiency attenuated AngII-induced leukocytosis.** White blood cells (WBCs), neutrophils (Neut), and monocytes (Mono) in peripheral blood were counted in AngII-infused MyD88<sup>+/+</sup> (n=19) and <sup>-/-</sup> (n=23) mice (LDLR<sup>-/-</sup> background) on a Hemavet analyzer. \* denotes P<0.01 for comparisons of MyD88<sup>-/-</sup> versus <sup>+/+</sup> by Mann-Whitney Rank Sum analysis.

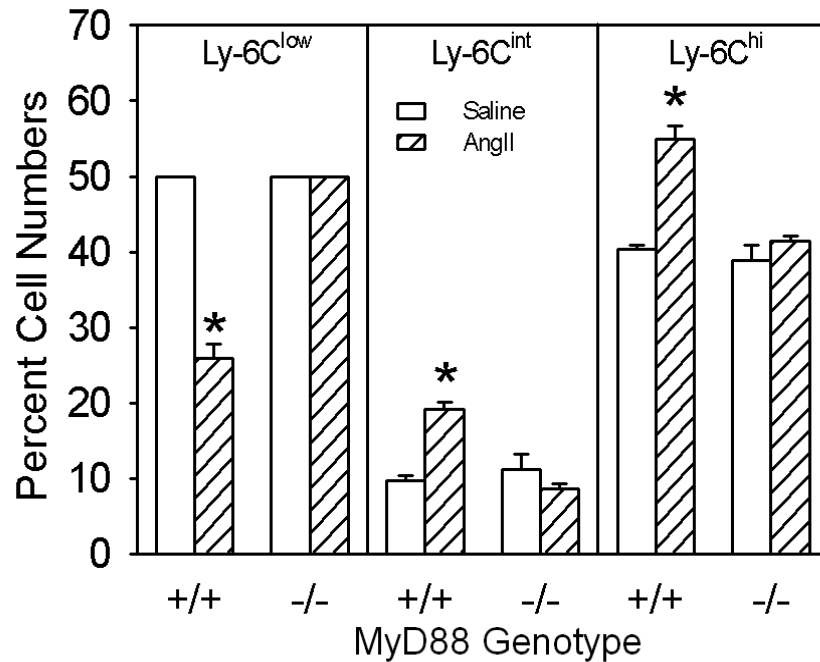

**Figure IV. MyD88 deficiency ablated AngII-induced redistribution of Ly-6C monocyte populations in peripheral blood.** Peripheral blood monocytes (CD115<sup>+</sup> and F4/80<sup>+</sup>) were divided into Ly-6C low (Ly-6C<sup>low</sup>), Ly-6C intermediate (Ly-6C<sup>int</sup>), and Ly-6C high (Ly-6C<sup>hi</sup>) populations in MyD88<sup>+/+</sup> (n=8/group for saline and AngII) or <sup>-/-</sup> (n=8/group for saline and AngII) mice in an LDLR<sup>-/-</sup> background. \* denotes P<0.001 for comparisons with MyD88<sup>+/+</sup> saline infusion, MyD88<sup>-/-</sup> saline infusion, and MyD88<sup>-/-</sup> AngII infusion, respectively, within Ly-6C monocyte populations by one way ANOVA on Ranks.

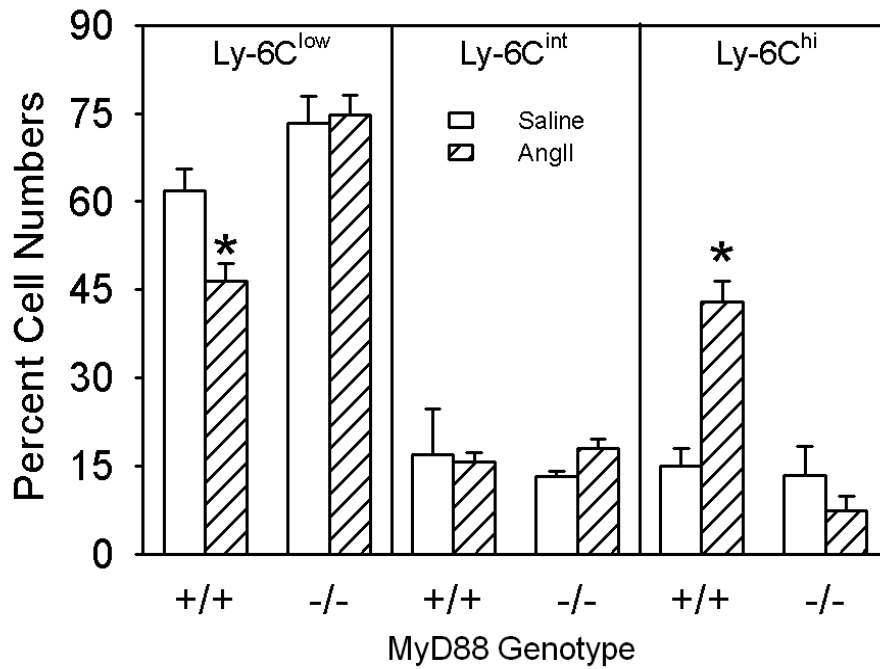

**Figure V.** MyD88 deficiency ablated AngII-induced redistribution of Ly-6C monocyte populations in spleen. Monocytes (CD115<sup>+</sup> and F4/80<sup>+</sup>) in spleens were divided into Ly-6C low (Ly-6C<sup>low</sup>), Ly-6C intermediate (Ly-6C<sup>int</sup>), and Ly-6C high (Ly-6C<sup>hi</sup>) populations in MyD88<sup>+/+</sup> or <sup>-/-</sup> (n=4/genotype) mice in an LDLR<sup>-/-</sup> background. \* denotes P<0.001 for comparisons with MyD88<sup>+/+</sup> saline, MyD88<sup>-/-</sup> saline, and MyD88<sup>-/-</sup> AngII, respectively, within Ly-6C monocyte populations by one way ANOVA on ranks.

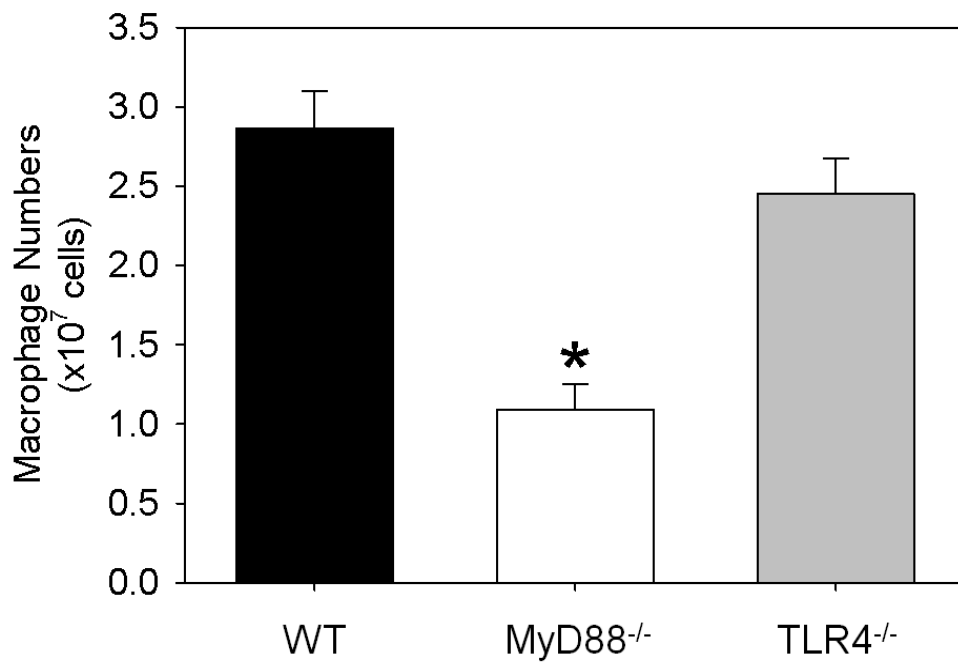

**Figure VI. MyD88 deficiency attenuated macrophage elicitation.** Thioglycollate-elicited CD68<sup>+</sup> peritoneal macrophages were quantified in wild type (WT; n=10), MyD88<sup>-/-</sup> (n=10), and TLR4<sup>-/-</sup> (n=5) mice in an LDLR<sup>-/-</sup> background. \* denotes P<0.001 for comparisons with WT and TLR4<sup>-/-</sup> groups.

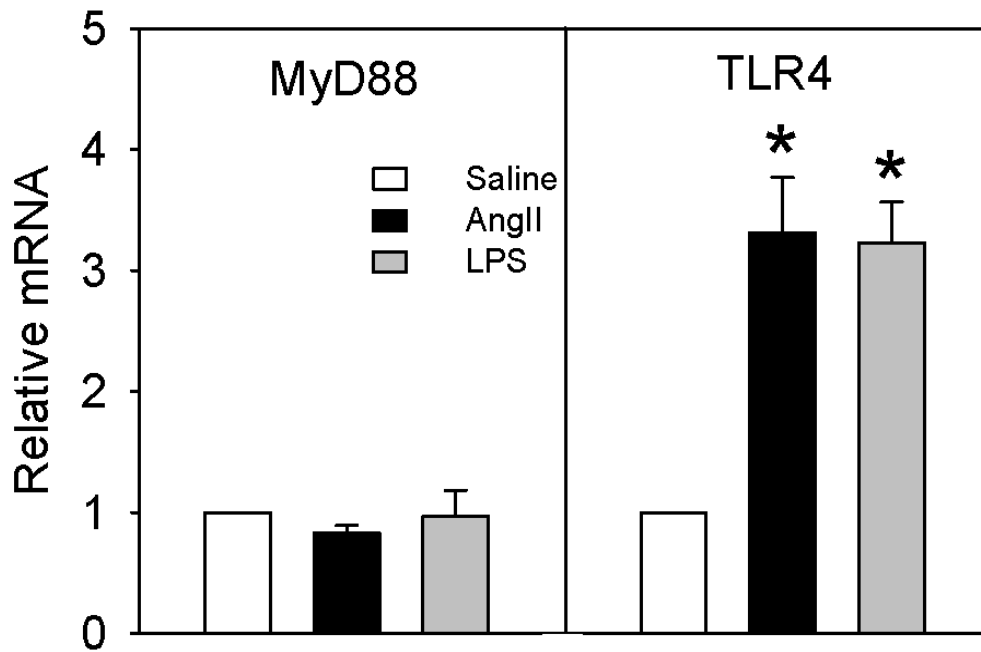

**Figure VII. AngII increased mRNA abundance of TLR4 but not MyD88 in SMCs.** mRNA abundance of MyD88 and TLR4 in SMCs isolated from suprarenal aortic regions of C57BL/6 male mice were determined by real-time PCR. Lipopolysaccharide (LPS; 1  $\mu$ g/ml) was used as TLR4 agonist. \* denotes  $P < 0.001$  for comparisons with cells incubated with saline.



## References

1. Bjorkbacka H, Kunjathoor VV, Moore KJ, Koehn S, Ordija CM, Lee MA, Means T, Halmen K, Luster AD, Golenbock DT, Freeman MW. Reduced atherosclerosis in MyD88-null mice links elevated serum cholesterol levels to activation of innate immunity signaling pathways. *Nat Med.* 2004;10:416-421.
2. Mullick AE, Tobias PS, Curtiss LK. Modulation of atherosclerosis in mice by Toll-like receptor 2. *J Clin Invest.* 2005;115:3149-3156.
3. Hoshino K, Takeuchi O, Kawai T, Sanjo H, Ogawa T, Takeda Y, Takeda K, Akira S. Cutting edge: Toll-like receptor 4 (TLR4)-deficient mice are hyporesponsive to lipopolysaccharide: evidence for TLR4 as the Lps gene product. *J Immunol.* 1999;162:3749-3752.
4. Daugherty A, Manning MW, Cassis LA. Angiotensin II promotes atherosclerotic lesions and aneurysms in apolipoprotein E-deficient mice. *J Clin Invest.* 2000;105:1605-1612.
5. Lu H, Rateri DL, Feldman DL, Charnigo Jr RJ, Fukamizu A, Ishida J, Oesterling EG, Cassis LA, Daugherty A. Renin inhibition reduces hypercholesterolemia-induced atherosclerosis in mice. *J Clin Invest.* 2008;118:984-993.
6. Daugherty A, Rateri D, Lu H, Balakrishnan A. Measuring blood pressure in mice using volume pressure recording, a tail-cuff method. *J Vis Exp.* 2009;1291.
7. Daugherty A, Pure E, Delfel-Butteiger D, Chen S, Leferovich J, Roselaar SE, Rader DJ. The effects of total lymphocyte deficiency on the extent of atherosclerosis in apolipoprotein E-/- mice. *J Clin Invest.* 1997;100:1575-1580.
8. Wang YX, Cassis LA, Daugherty A. Angiotensin II-induced abdominal aortic aneurysms. *A Handbook of Mouse Models for Cardiovascular Disease.* 2006;Ed. Q. Xu, John Wiley & Sons:125-136.
9. Daugherty A, Whitman SC. Quantification of atherosclerosis in mice. *Methods Mol Biol.* 2003;209:293-309.
10. Daugherty A, Rateri DL. Development of experimental designs for atherosclerosis studies in mice. *Methods.* 2005;36:129-138.
11. Lu H, Rateri DL, Daugherty A. Immunostaining of mouse atherosclerosis lesions. *Methods Mol Med.* 2007;139:77-94.
12. Gautier EL, Jakubzick C, Randolph GJ. Regulation of the migration and survival of monocyte subsets by chemokine receptors and its relevance to atherosclerosis. *Arterioscler Thromb Vasc Biol.* 2009;29:1412-1418.
13. Sendobry SM, Cornicelli JA, Welch K, Grusby MJ, Daugherty A. Absence of T lymphocyte-derived cytokines fails to diminish macrophage 12/15-lipoxygenase expression in vivo. *J Immunol.* 1998;161:1477-82.
14. Owens AP 3rd, Subramanian V, Moorlegghen JJ, Guo Z, McNamara CA, Cassis LA, Daugherty A. Angiotensin II induces a region-specific hyperplasia of the ascending aorta through regulation of inhibitor of differentiation 3. *Circ Res.* 2010;106:611-619.
15. Ray JL, Leach R, Herbert JM, Benson M. Isolation of vascular smooth muscle cells from a single murine aorta. *Methods Cell Sci.* 2001;23:185-188.

16. Lu H, Boustany-Kari CM, Daugherty A, Cassis LA. Angiotensin II increases adipose angiotensinogen expression. *Am J Physiol Endocrinol Metab.* 2007;292:E1280-1287.
